# Supplementary material for: Post traumatic stress symptoms, anxiety, and depression in patients after intensive care unit discharge – a longitudinal cohort study from a LMIC tertiary care centre
Source: PubMed Central journal article supplement (PMC7216410; doi:10.1186/s12888-020-02632-x), 2020-05-12
Supplement: 12888_2020_2632_MOESM1_ESM.pdf [file 12888_2020_2632_MOESM1_ESM.pdf]

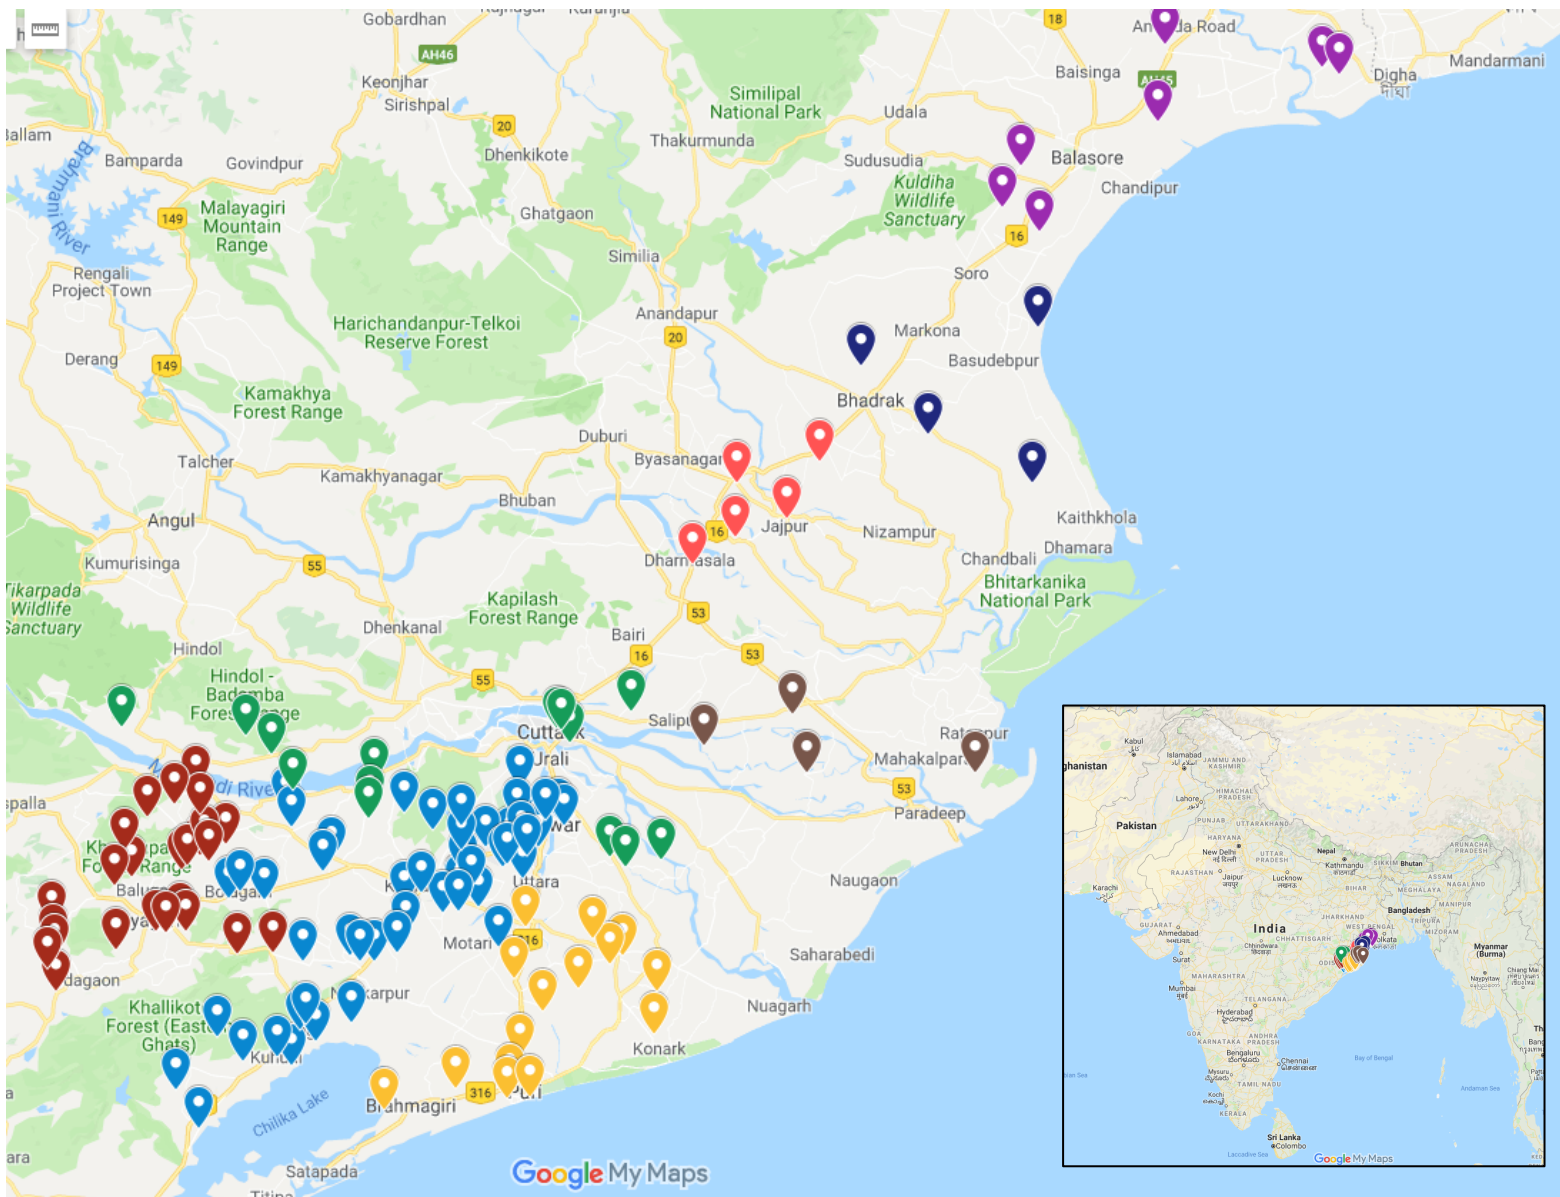

Fig.2 Location of home visits made for post ICU follow up. Courtesy “Google Map data: Google, DigitalGlobe”. Google. (n.d.). [Google Maps depicting ICMO study phase 1 home visits]. Retrieved from; [https://drive.google.com/open?id=1\\_Z82WIMI3wGYOxz2ISu8Nvhu5RGMFQku&usp=sharing](https://drive.google.com/open?id=1_Z82WIMI3wGYOxz2ISu8Nvhu5RGMFQku&usp=sharing)

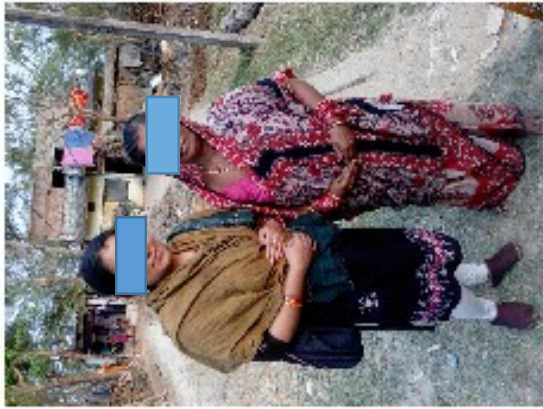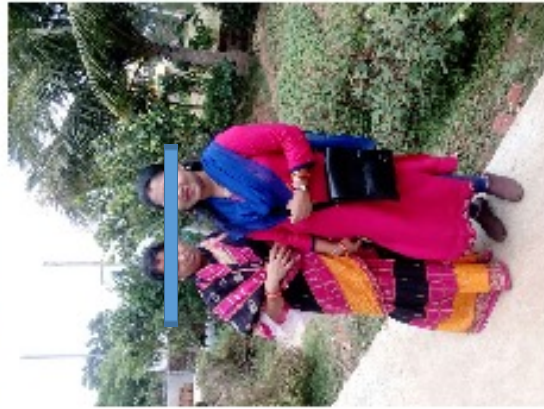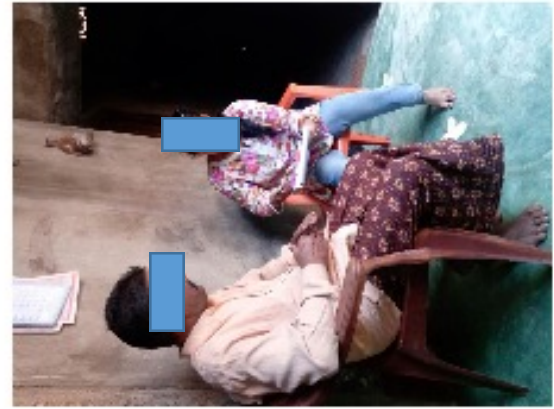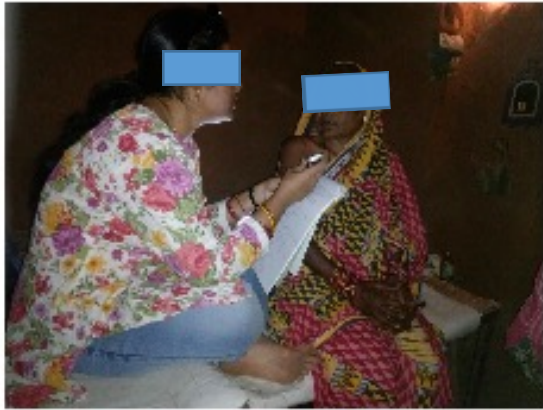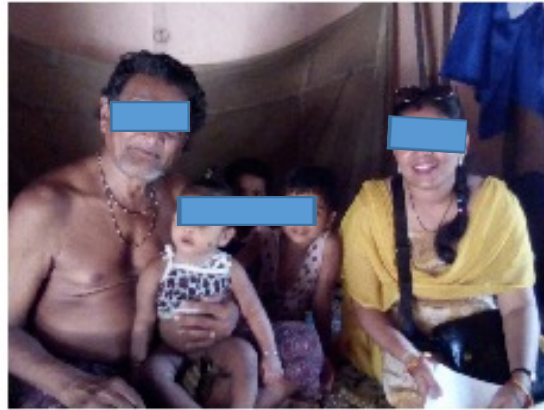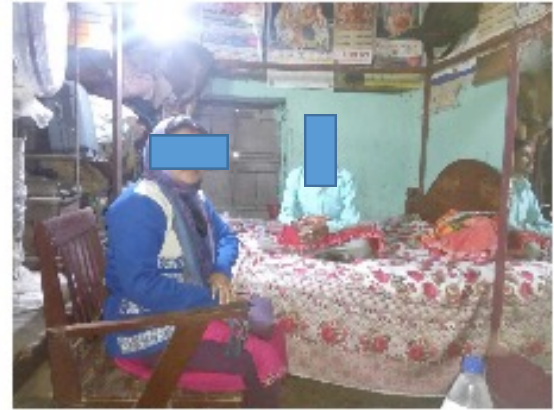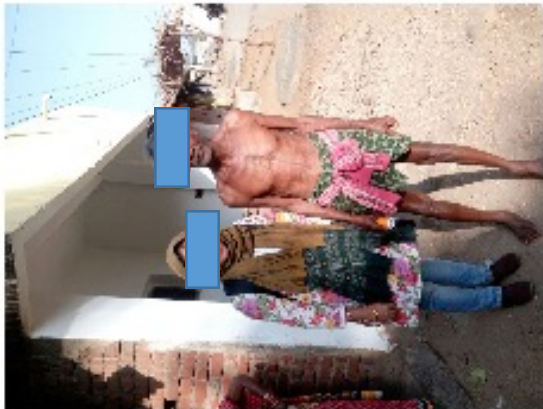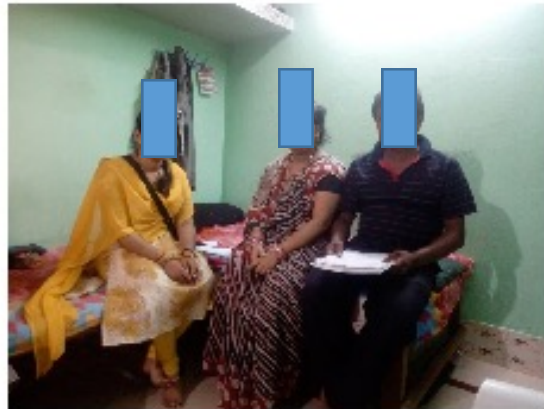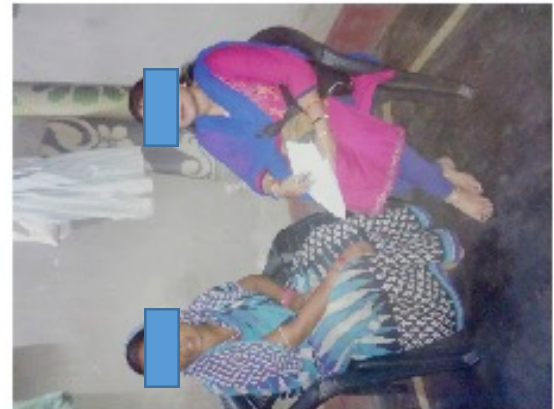

Representative photographs of Home Visits- All patients and their families have given written consent to be photographed and for their photographs to be used for academic purpose.
