# Supplementary material for: Post traumatic stress symptoms, anxiety, and depression in patients after intensive care unit discharge – a longitudinal cohort study from a LMIC tertiary care centre
Source: PubMed Central journal article supplement (PMC7216410; doi:10.1186/s12888-020-02632-x), 2020-05-12
Supplement: 12888_2020_2632_MOESM3_ESM.pdf [file 12888_2020_2632_MOESM3_ESM.pdf]

MODEL INFO:  
 Observations: 1979  
 Dependent Variable: ies\_r\_complete ICU  
 Type: Mixed effects linear regression

MODEL FIT:  
 AIC = 9414.77, BIC = 9532.17  
 Pseudo-R<sup>2</sup> (fixed effects) = 0.46  
 Pseudo-R<sup>2</sup> (total) = 0.67

FIXED EFFECTS:

|                      | Est.  | S.E. | t val. | d.f.    | p    |
|----------------------|-------|------|--------|---------|------|
| (Intercept)          | 9.11  | 0.63 | 14.36  | 338.09  | 0.00 |
| age                  | -0.02 | 0.01 | -2.38  | 316.87  | 0.02 |
| sexM                 | 0.04  | 0.24 | 0.18   | 317.18  | 0.86 |
| education_level1     | -0.31 | 0.30 | -1.06  | 317.50  | 0.29 |
| education_level2     | -0.68 | 0.56 | -1.21  | 316.96  | 0.23 |
| education_level3     | -1.51 | 1.23 | -1.23  | 324.41  | 0.22 |
| INDEXICU EQ5D        | -2.94 | 0.71 | -4.15  | 317.18  | 0.00 |
| marital_status1      | -0.44 | 0.43 | -1.01  | 317.51  | 0.31 |
| life stressor any`1  | 3.82  | 0.87 | 4.37   | 316.76  | 0.00 |
| icu_los              | -0.02 | 0.03 | -0.63  | 317.90  | 0.53 |
| mv1                  | 0.31  | 0.27 | 1.14   | 317.03  | 0.25 |
| apache_nursing_sheet | 0.08  | 0.03 | 2.61   | 317.87  | 0.01 |
| tmsofa               | -0.06 | 0.05 | -1.26  | 320.40  | 0.21 |
| benzos any`1         | 0.38  | 0.26 | 1.46   | 316.90  | 0.15 |
| TIME2                | -2.24 | 0.18 | -12.79 | 1643.18 | 0.00 |
| TIME3                | -3.66 | 0.18 | -20.89 | 1643.18 | 0.00 |
| TIME4                | -5.32 | 0.18 | -30.33 | 1643.18 | 0.00 |
| TIME5                | -6.43 | 0.18 | -36.69 | 1643.18 | 0.00 |
| TIME6                | -7.24 | 0.18 | -41.06 | 1644.66 | 0.00 |

|                  | Est.  | 2.5%  | 97.5% | t val. |
|------------------|-------|-------|-------|--------|
| (Intercept)      | 9.11  | 7.87  | 10.36 | 14.36  |
| 338.09 0.00      |       |       |       |        |
| age              | -0.02 | -0.04 | -0.00 | -2.38  |
| 316.87 0.02      |       |       |       |        |
| sexM             | 0.04  | -0.42 | 0.50  | 0.18   |
| 317.18 0.86      |       |       |       |        |
| education_level1 | -0.31 | -0.90 | 0.27  | -1.06  |
| 317.50 0.29      |       |       |       |        |
| education_level2 | -0.68 | -1.78 | 0.42  | -1.21  |
| 316.96 0.23      |       |       |       |        |
| education_level3 | -1.51 | -3.91 | 0.89  | -1.23  |
| 324.41 0.22      |       |       |       |        |

|                      |       |       |       |        |
|----------------------|-------|-------|-------|--------|
| INDEXICU EQ5D        | -2.94 | -4.32 | -1.55 | -4.15  |
| 317.18 0.00          |       |       |       |        |
| marital_status1      | -0.44 | -1.29 | 0.41  | -1.01  |
| 317.51 0.31          |       |       |       |        |
| life stressor any`1  | 3.82  | 2.11  | 5.53  | 4.37   |
| 316.76 0.00          |       |       |       |        |
| icu_los              | -0.02 | -0.09 | 0.04  | -0.63  |
| 317.90 0.53          |       |       |       |        |
| mv1                  | 0.31  | -0.22 | 0.84  | 1.14   |
| 317.03 0.25          |       |       |       |        |
| apache_nursing_sheet | 0.08  | 0.02  | 0.15  | 2.61   |
| 317.87 0.01          |       |       |       |        |
| tmsofa               | -0.06 | -0.16 | 0.03  | -1.26  |
| 320.40 0.21          |       |       |       |        |
| benzos any`1         | 0.38  | -0.13 | 0.88  | 1.46   |
| 316.90 0.15          |       |       |       |        |
| TIME2                | -2.24 | -2.59 | -1.90 | -12.79 |
| 1643.18 0.00         |       |       |       |        |
| TIME3                | -3.66 | -4.01 | -3.32 | -20.89 |
| 1643.18 0.00         |       |       |       |        |
| TIME4                | -5.32 | -5.66 | -4.97 | -30.33 |
| 1643.18 0.00         |       |       |       |        |
| TIME5                | -6.43 | -6.78 | -6.09 | -36.69 |
| 1643.18 0.00         |       |       |       |        |
| TIME6                | -7.24 | -7.59 | -6.90 | -41.06 |
| 1644.66 0.00         |       |       |       |        |

| d.f.              | p | Est.  | 2.5%  | 97.5% | t val. |
|-------------------|---|-------|-------|-------|--------|
| (Intercept)       |   | 7.89  | 6.86  | 8.93  | 14.88  |
| 348.24 0.00       |   |       |       |       |        |
| age               |   | -0.33 | -0.60 | -0.06 | -2.38  |
| 316.87 0.02       |   |       |       |       |        |
| sex               |   | 0.04  | -0.42 | 0.50  | 0.18   |
| 317.18 0.86       |   |       |       |       |        |
| education_level1  |   | -0.31 | -0.90 | 0.27  | -1.06  |
| 317.50 0.29       |   |       |       |       |        |
| education_level2  |   | -0.68 | -1.78 | 0.42  | -1.21  |
| 316.96 0.23       |   |       |       |       |        |
| education_level3  |   | -1.51 | -3.91 | 0.89  | -1.23  |
| 324.41 0.22       |   |       |       |       |        |
| INDEXICU EQ5D     |   | -0.50 | -0.74 | -0.27 | -4.15  |
| 317.18 0.00       |   |       |       |       |        |
| marital_status    |   | -0.44 | -1.29 | 0.41  | -1.01  |
| 317.51 0.31       |   |       |       |       |        |
| life stressor any |   | 3.82  | 2.11  | 5.53  | 4.37   |
| 316.77 0.00       |   |       |       |       |        |
| icu_los           |   | -0.08 | -0.35 | 0.18  | -0.63  |

|                      |      |       |       |       |        |
|----------------------|------|-------|-------|-------|--------|
| 317.90               | 0.53 |       |       |       |        |
| mv                   |      | 0.31  | -0.22 | 0.84  | 1.14   |
| 317.03               | 0.25 |       |       |       |        |
| apache_nursing_sheet |      | 0.39  | 0.10  | 0.69  | 2.61   |
| 317.87               | 0.01 |       |       |       |        |
| tmsofa               |      | -0.20 | -0.50 | 0.11  | -1.26  |
| 320.40               | 0.21 |       |       |       |        |
| benzos any           |      | 0.38  | -0.13 | 0.88  | 1.46   |
| 316.90               | 0.15 |       |       |       |        |
| TIME2                |      | -2.24 | -2.59 | -1.90 | -12.79 |
| 1643.18              | 0.00 |       |       |       |        |
| TIME3                |      | -3.66 | -4.01 | -3.32 | -20.89 |
| 1643.18              | 0.00 |       |       |       |        |
| TIME4                |      | -5.32 | -5.66 | -4.97 | -30.33 |
| 1643.18              | 0.00 |       |       |       |        |
| TIME5                |      | -6.43 | -6.78 | -6.09 | -36.69 |
| 1643.18              | 0.00 |       |       |       |        |
| TIME6                |      | -7.24 | -7.59 | -6.90 | -41.06 |
| 1644.66              | 0.00 |       |       |       |        |

-----  
p values calculated using Satterthwaite d.f.

RANDOM EFFECTS:

| Group    | Parameter   | Std. Dev. |
|----------|-------------|-----------|
| study_id | (Intercept) | 1.81      |
| Residual |             | 2.26      |

Grouping variables:

| Group    | # groups | ICC  |
|----------|----------|------|
| study_id | 331      | 0.39 |
